# Supplementary material for: Isolation and Identification of Alternaria alternata from Potato Plants Affected by Leaf Spot Disease in Korea: Selection of Effective Fungicides
Source: MDPI journal article supplement (doi:10.3390/jof10010053), 2024-01-07
Supplement: s1 [file s1]

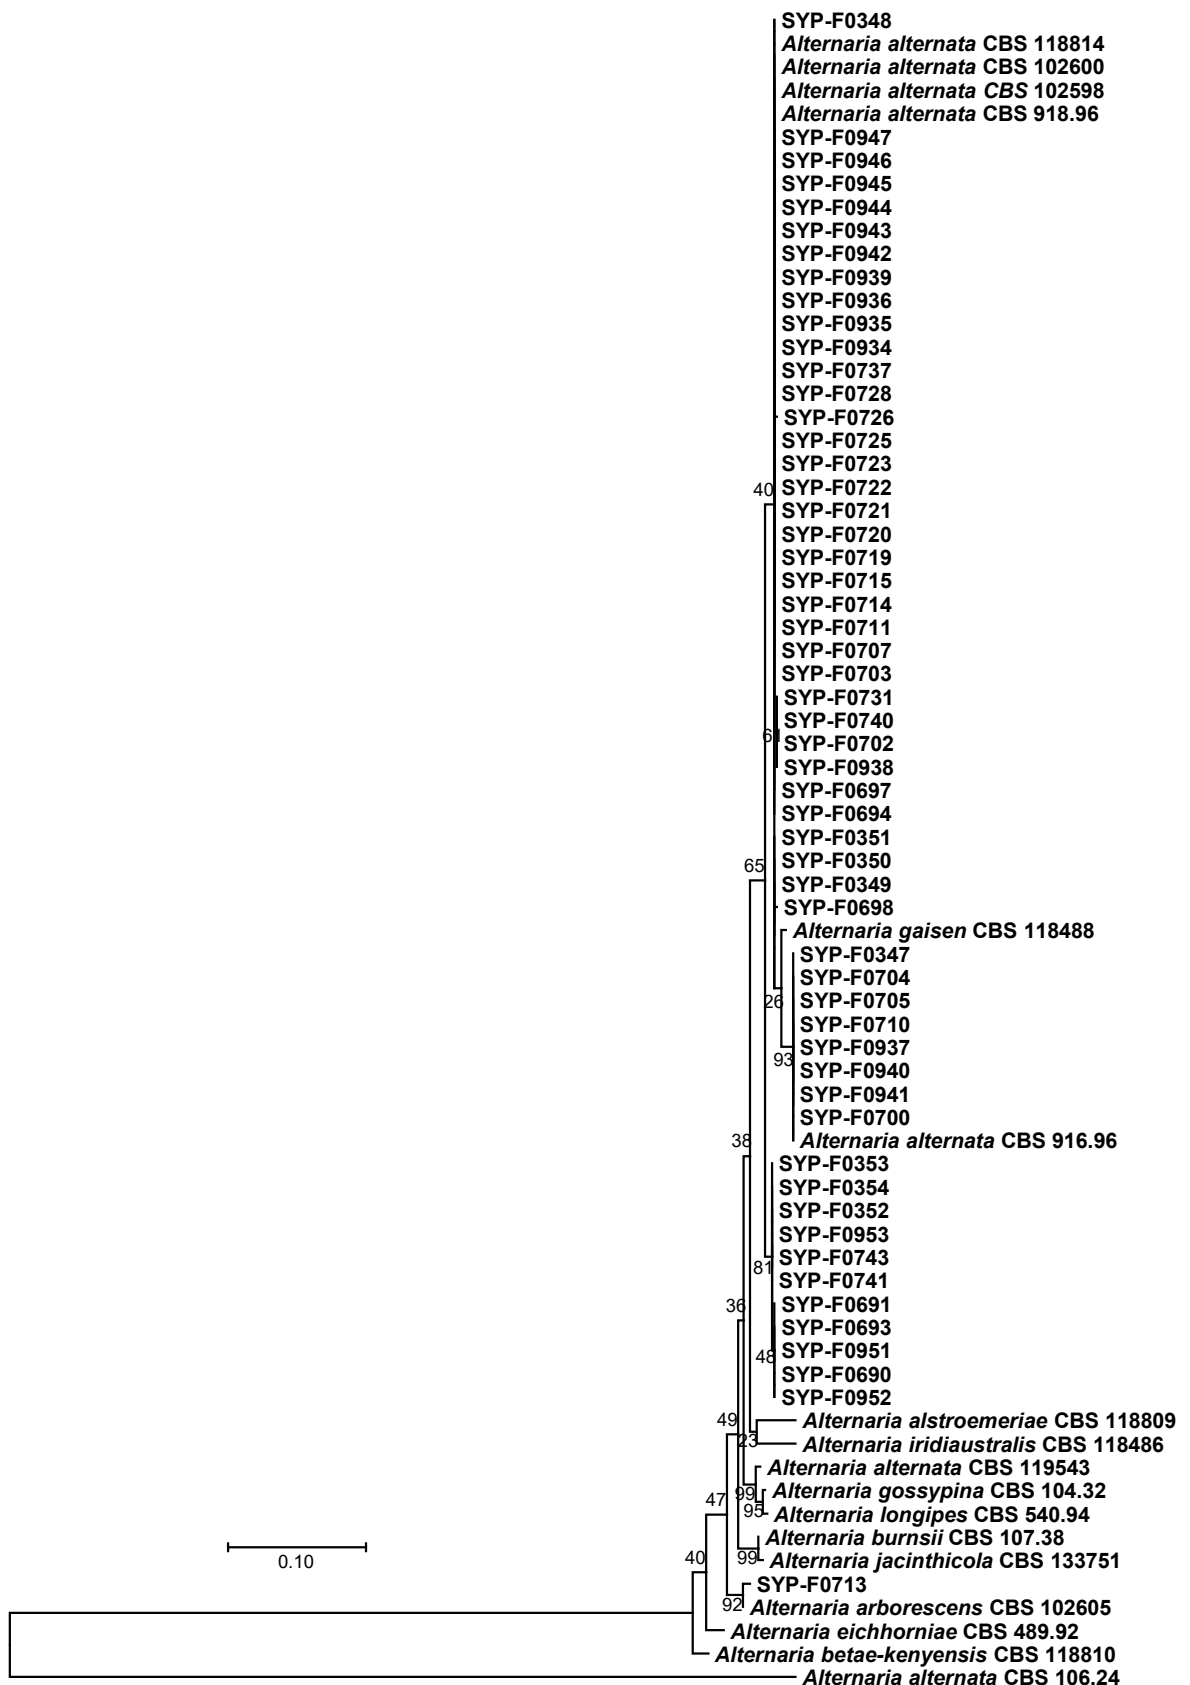

**Supplementary Figure S5.** Phylogenetic tree constructed based on the OPA 10-2 sequence of the *Alternaria* spp. isolates and reference sequences retrieved from GenBank (accession numbers shown in Supplementary Table S1). The tree was constructed by maximum-likelihood, and bootstrap values (1,000 replications) are shown in front of each node. MEGA X was used for the analysis.
