# Supplementary material for: Isolation and Identification of Alternaria alternata from Potato Plants Affected by Leaf Spot Disease in Korea: Selection of Effective Fungicides
Source: MDPI journal article supplement (doi:10.3390/jof10010053), 2024-01-07
Supplement: s1 [file s1]

**Supplementary Table S1. Isolates used in this study and their GenBank accession numbers. Bold accession numbers were generated in other studies**

| Isolates  | The closest matched GenBank taxa | Accession numbers of gene bank |          |          |          |          |          |          |
|-----------|----------------------------------|--------------------------------|----------|----------|----------|----------|----------|----------|
|           |                                  | ITS                            | GAPDH    | TEF1     | RPB2     | Alta1    | endoPG   | OPA10-2  |
| SYP-F0347 | <i>Alternaria alternata</i>      | OR885731                       | OR900248 | OR910019 | OR916211 | OR900374 | OR901696 | OR900460 |
| SYP-F0348 | <i>Alternaria alternata</i>      | OR885732                       | OR900249 | OR910020 | OR916212 | OR900375 | OR901697 | OR900461 |
| SYP-F0349 | <i>Alternaria alternata</i>      | OR885733                       | OR900250 | OR910021 | OR916213 | OR900376 | OR901698 | OR900462 |
| SYP-F0350 | <i>Alternaria alternata</i>      | OR885734                       | OR900251 | OR910022 | OR916214 | OR900377 | OR901699 | OR900463 |
| SYP-F0351 | <i>Alternaria alternata</i>      | OR885735                       | OR900252 | OR910023 | OR916215 | OR900378 | OR901700 | OR900464 |
| SYP-F0354 | <i>Alternaria alternata</i>      | OR885738                       | OR900253 | OR910024 | OR916216 | OR900379 | OR901701 | OR900465 |
| SYP-F0690 | <i>Alternaria alternata</i>      | OR885739                       | OR900254 | OR910025 | OR916217 | OR900380 | OR901702 | OR900466 |
| SYP-F0691 | <i>Alternaria alternata</i>      | OR885740                       | OR900255 | OR910026 | OR916218 | OR900381 | OR901703 | OR900467 |
| SYP-F0693 | <i>Alternaria alternata</i>      | OR885741                       | OR900256 | OR910027 | OR916219 | OR900382 | OR901704 | OR900468 |
| SYP-F0694 | <i>Alternaria alternata</i>      | OR885742                       | OR900257 | OR910028 | OR916220 | OR900383 | OR901705 | OR900469 |
| SYP-F0697 | <i>Alternaria alternata</i>      | OR885743                       | OR900258 | OR910029 | OR916221 | OR900384 | OR901706 | OR900470 |
| SYP-F0698 | <i>Alternaria alternata</i>      | OR885744                       | OR900259 | OR910030 | OR916222 | OR900385 | OR901707 | OR900471 |
| SYP-F0700 | <i>Alternaria alternata</i>      | OR885745                       | OR900260 | OR910031 | OR916223 | OR900386 | OR901708 | OR900472 |
| SYP-F0702 | <i>Alternaria alternata</i>      | OR885747                       | OR900261 | OR910032 | OR916224 | OR900387 | OR901709 | OR900473 |
| SYP-F0703 | <i>Alternaria alternata</i>      | OR885748                       | OR900262 | OR910033 | OR916225 | OR900388 | OR901710 | OR900474 |
| SYP-F0704 | <i>Alternaria alternata</i>      | OR885749                       | OR900263 | OR910034 | OR916226 | OR900389 | OR901711 | OR900475 |
| SYP-F0705 | <i>Alternaria alternata</i>      | OR885750                       | OR900264 | OR910035 | OR916227 | OR900390 | OR901712 | OR900476 |
| SYP-F0707 | <i>Alternaria alternata</i>      | OR885752                       | OR900265 | OR910036 | OR916228 | OR900391 | OR901713 | OR900477 |
| SYP-F0710 | <i>Alternaria alternata</i>      | OR885753                       | OR900266 | OR910037 | OR916229 | OR900392 | OR901714 | OR900478 |
| SYP-F0711 | <i>Alternaria alternata</i>      | OR885754                       | OR900267 | OR910038 | OR916230 | OR900393 | OR901715 | OR900479 |
| SYP-F0715 | <i>Alternaria alternata</i>      | OR885758                       | OR900268 | OR910039 | OR916231 | OR900394 | OR901716 | OR900480 |
| SYP-F0719 | <i>Alternaria alternata</i>      | OR885762                       | OR900269 | OR910040 | OR916232 | OR900395 | OR901717 | OR900481 |
| SYP-F0720 | <i>Alternaria alternata</i>      | OR885763                       | OR900270 | OR910041 | OR916233 | OR900396 | OR901718 | OR900482 |
| SYP-F0721 | <i>Alternaria alternata</i>      | OR885764                       | OR900271 | OR910042 | OR916234 | OR900397 | OR901719 | OR900483 |
| SYP-F0722 | <i>Alternaria alternata</i>      | OR885765                       | OR900272 | OR910043 | OR916235 | OR900398 | OR901720 | OR900484 |
| SYP-F0723 | <i>Alternaria alternata</i>      | OR885766                       | OR900273 | OR910044 | OR916236 | OR900399 | OR901721 | OR900485 |

|           |                             |          |          |          |          |          |          |          |
|-----------|-----------------------------|----------|----------|----------|----------|----------|----------|----------|
| SYP-F0725 | <i>Alternaria alternata</i> | OR885767 | OR900274 | OR910045 | OR916237 | OR900400 | OR901722 | OR900486 |
| SYP-F0726 | <i>Alternaria alternata</i> | OR885768 | OR900275 | OR910046 | OR916238 | OR900401 | OR901723 | OR900487 |
| SYP-F0728 | <i>Alternaria alternata</i> | OR885769 | OR900276 | OR910047 | OR916239 | OR900402 | OR901724 | OR900488 |
| SYP-F0731 | <i>Alternaria alternata</i> | OR885771 | OR900277 | OR910048 | OR916240 | OR900403 | OR901725 | OR900489 |
| SYP-F0737 | <i>Alternaria alternata</i> | OR885773 | OR900278 | OR910049 | OR916241 | OR900404 | OR901726 | OR900490 |
| SYP-F0740 | <i>Alternaria alternata</i> | OR885774 | OR900279 | OR910050 | OR916242 | OR900405 | OR901727 | OR900491 |
| SYP-F0741 | <i>Alternaria alternata</i> | OR885775 | OR900280 | OR910051 | OR916243 | OR900406 | OR901728 | OR900492 |
| SYP-F0743 | <i>Alternaria alternata</i> | OR885777 | OR900281 | OR910052 | OR916244 | OR912470 | OR901729 | OR900493 |
| SYP-F0934 | <i>Alternaria alternata</i> | OP581413 | OP588286 | OP588300 | OP588314 | OP588328 | OP588342 | OP588356 |
| SYP-F0935 | <i>Alternaria alternata</i> | OP581414 | OP588287 | OP588301 | OP588315 | OP588329 | OP588343 | OP588357 |
| SYP-F0936 | <i>Alternaria alternata</i> | OP581415 | OP588288 | OP588302 | OP588316 | OP588330 | OP588344 | OP588358 |
| SYP-F0937 | <i>Alternaria alternata</i> | OR885782 | OR900282 | OR910053 | OR916245 | OR900407 | OR901730 | OR900494 |
| SYP-F0938 | <i>Alternaria alternata</i> | OR885783 | OR900283 | OR910054 | OR916246 | OR900408 | OR901731 | OR900495 |
| SYP-F0939 | <i>Alternaria alternata</i> | OR885784 | OR900284 | OR910055 | OR916247 | OR900409 | OR901732 | OR900496 |
| SYP-F0940 | <i>Alternaria alternata</i> | OR885785 | OR900285 | OR910056 | OR916248 | OR900410 | OR901733 | OR900497 |
| SYP-F0941 | <i>Alternaria alternata</i> | OR885786 | OR900286 | OR910057 | OR916249 | OR900411 | OR901734 | OR900498 |
| SYP-F0942 | <i>Alternaria alternata</i> | OR885787 | OR900287 | OR910058 | OR916250 | OR900412 | OR901735 | OR900499 |
| SYP-F0943 | <i>Alternaria alternata</i> | OR885788 | OR900288 | OR910059 | OR916251 | OR900413 | OR901736 | OR900500 |
| SYP-F0944 | <i>Alternaria alternata</i> | OR885789 | OR900289 | OR910060 | OR916252 | OR900414 | OR901737 | OR900501 |
| SYP-F0945 | <i>Alternaria alternata</i> | OR885790 | OR900290 | OR910061 | OR916253 | OR900415 | OR901738 | OR900502 |
| SYP-F0946 | <i>Alternaria alternata</i> | OR885791 | OR900291 | OR910062 | OR916254 | OR900416 | OR901739 | OR900503 |
| SYP-F0947 | <i>Alternaria alternata</i> | OR885792 | OR900292 | OR910063 | OR916255 | OR900417 | OR901740 | OR900504 |
| SYP-F0951 | <i>Alternaria alternata</i> | OR885793 | OR900293 | OR910064 | OR916256 | OR900418 | OR901741 | OR900505 |
| SYP-F0952 | <i>Alternaria alternata</i> | OR885794 | OR900294 | OR910065 | OR916257 | OR900419 | OR901742 | OR900506 |
| SYP-F0953 | <i>Alternaria alternata</i> | OR885795 | OR900295 | OR910066 | OR916258 | OR900420 | OR901743 | OR900507 |
| SYP-F0352 | <i>Alternaria alternata</i> | OR885736 | OR900296 | OR901687 | OR909916 | OR900421 | OR901744 | OR900508 |
| SYP-F0353 | <i>Alternaria alternata</i> | OR885737 | OR900297 | OR901688 | OR909917 | OR900422 | OR901745 | OR900509 |
| SYP-F0713 | <i>Alternaria alternata</i> | OR885756 | OR900298 | OR901689 | OR909918 | OR900423 | OR901746 | OR900510 |
| SYP-F0714 | <i>Alternaria alternata</i> | OR885757 | OR900299 | OR901690 | OR909919 | OR900424 | OR901747 | OR900511 |

---

|                       |                                                       |          |          |          |          |          |          |          |
|-----------------------|-------------------------------------------------------|----------|----------|----------|----------|----------|----------|----------|
| Reference<br>Isolates | <i>Alternaria alstroemeriae</i> CBS 118809            | KP124297 | KP124154 | KP125072 | KP124765 | np       | KP123994 | KP124602 |
|                       | <i>Alternaria alternantherae</i> CBS 124392           | KC584179 | KC584096 | KC584633 | KC584374 | KP123846 | np       | np       |
|                       | <i>Alternaria alternata</i> CBS 106.24                | KP124298 | KP124155 | KP125073 | KP124766 | KP123847 | AY295020 | JQ800620 |
|                       | <i>Alternaria alternata</i> CBS 916.96                | AF347031 | AY278808 | KC584634 | KC584375 | AY563301 | JQ811978 | KP124632 |
|                       | <i>Alternaria alternata</i> CBS 918.96                | AF347032 | AY278809 | KC584693 | KC584435 | AY563302 | KP124026 | KP124633 |
|                       | <i>Alternaria alternata</i> CBS 102598                | KP124329 | KP124184 | KP125105 | KP124797 | KP123878 | KP124031 | KP124638 |
|                       | <i>Alternaria alternata</i> CBS 102600                | KP124331 | KP124186 | KP125107 | KP124799 | KP123880 | KP124033 | KP124640 |
|                       | <i>Alternaria alternata</i> CBS 118814                | KP124357 | KP124211 | KP125133 | KP124825 | KP123906 | KP124059 | KP124669 |
|                       | <i>Alternaria alternata</i> CBS 119543                | KP124363 | KP124215 | KP125139 | KP124831 | KP123911 | KP124065 | KP124674 |
|                       | <i>Alternaria arborescens</i> SC_CBS 102605           | AF347033 | AY278810 | KC584636 | KC584377 | AY563303 | AY295028 | KP124712 |
|                       | <i>Alternaria betae-kenyensis</i> CBS 118810          | KP124419 | KP124270 | KP125197 | KP124888 | KP123966 | KP124123 | KP124733 |
|                       | <i>Alternaria burnsii</i> CBS 107.38                  | KP124420 | JQ646305 | KP125198 | KP124889 | KP123967 | KP124124 | KP124734 |
|                       | <i>Alternaria eichhorniae</i> CBS 489.92              | KC146356 | KP124276 | KP125204 | KP124895 | KP123973 | KP124130 | KP124740 |
|                       | <i>Alternaria gaisen</i> CBS 118488                   | KP124427 | KP124278 | KP125206 | KP124897 | KP123975 | KP124132 | KP124743 |
|                       | <i>Alternaria gossypina</i> CBS 104.32                | KP124430 | JQ646312 | KP125209 | KP124900 | JQ646395 | KP124135 | KP124746 |
|                       | <i>Alternaria iridiaustralis</i> CBS 118486           | KP124435 | KP124284 | KP125214 | KP124905 | KP123981 | KP124140 | KP124751 |
|                       | <i>Alternaria jacinthicola</i> CBS 133751; MUCL 53159 | KP124438 | KP124287 | KP125217 | KP124908 | KP123984 | KP124143 | KP124754 |
|                       | <i>Alternaria longipes</i> CBS 540.94                 | AY278835 | AY278811 | KC584667 | KC584409 | AY563304 | KP124147 | KP124758 |
|                       | <i>Alternaria brassicicola</i> CBS 118699             | JX499031 | KC584103 | KC584642 | KC584383 |          |          |          |
|                       | <i>Alternaria infectoria</i> CBS 210.86               | DQ323697 | AY278793 | KC584662 | KC584404 |          |          |          |
|                       | <i>Alternaria papavericola</i> CBS 116606             | FJ357310 | FJ357298 | KC584705 | KC584446 |          |          |          |
|                       | <i>Alternaria avenicola</i> CBS 121459                | KC584183 | KC584100 | KC584639 | KC584380 |          |          |          |
|                       | <i>Alternaria solani</i> CBS 109157                   | KJ718238 | GQ180080 | KJ718585 | KJ718413 | KJ718746 |          |          |
